# Supplementary material
Source: Springer Nature journal article supplement (https://www.springermedizin.de/resource/supplementary/12874_2013_955_MOESM2_ESM.pdf/9433212)

## Raw mortality

### Decomposition of additive time series

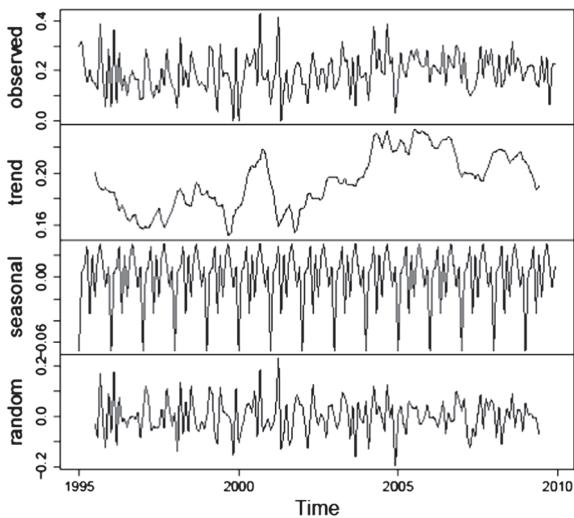

## Expected mortality

### Decomposition of additive time series

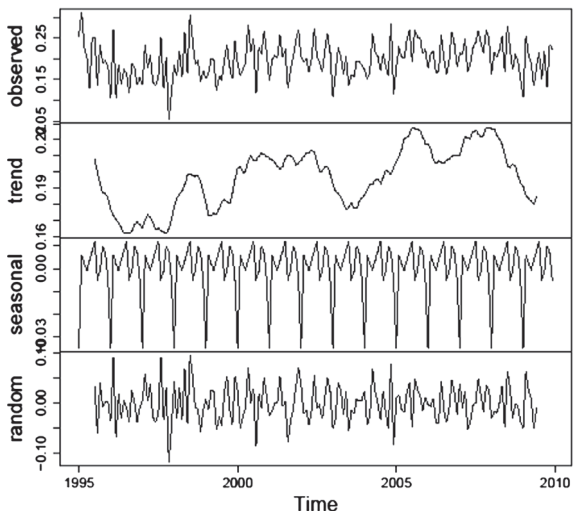

Supplement: MOESM2 [file 9433212]
